# Supplementary material for: Development of a Machine Learning Model for Survival Risk Stratification of Patients With Advanced Oral Cancer
Source: JAMA Netw Open. 2020 Aug 21;3(8):e2011768. doi: 10.1001/jamanetworkopen.2020.11768 (PMC7442932; doi:10.1001/jamanetworkopen.2020.11768)
Supplement: Supplement. — eFigure 1. Elastic-Net Penalized Cox Proportional Hazards Regression Model Development and Evaluation Flowchart eFigure 2. Kaplan-Meier Curves of Patients Who Underwent Postoperative Adjuvant Concurrent Chemoradiotherapy Stratified Using Elastic Net Penalized Cox Proportional Hazards Regression Models Built With Genetic Features Alone eFigure 3. Kaplan-Meier Curves of Patients Who Underwent Postoperative Adjuvant Radiotherapy Stratified Using Elastic Net Penalized Cox Proportional Hazards Regression Models Built With Genetic Features Alone eFigure 4. Kaplan-Meier Curves of Patients Who Underwent Surgery Alone Stratified Using Elastic Net Penalized Cox Proportional Hazards Regression Models Built With Genetic Features Alone eFigure 5. Features Associated With Prognostic Prediction eTable 1. Follow-up Duration in Each Group of Patients eTable 2. Akaike Information Criterion Comparison of the Elastic Net Penalized Cox Proportional Hazards Regression Models Built With Comprehensive Clinicopathologic and Genetic Features vs Clinicopathologic Features Alone and Genetic Features eTable 3. Harrell’s Concordance Index Comparison of the Elastic Net Penalized Cox Proportional Hazards Regression Models Built With Comprehensive Clinicopathologic and Genetic Features vs Clinicopathologic Features Alone and Genetic Features eTable 4. Features Associated With Prognostic Prediction and the Hazard Ratios eAppendix. Online Calculator for Survival Risk Stratification in Patients With Advanced Oral Cancer [file jamanetwopen-3-e2011768-s001.pdf]

## Supplementary Online Content

Tseng Y-J, Wang H-Y, Lin T-W, Lu J-J, Hsieh C-H, Liao C-T. Development of a machine learning model for survival risk stratification of patients with advanced oral cancer. *JAMA Netw Open*. 2020;3(8):e2011768. doi:10.1001/jamanetworkopen.2020.11768

**eFigure 1.** Elastic-Net Penalized Cox Proportional Hazards Regression Model Development and Evaluation Flowchart

**eFigure 2.** Kaplan-Meier Curves of Patients Who Underwent Postoperative Adjuvant Concurrent Chemoradiotherapy Stratified Using Elastic Net Penalized Cox Proportional Hazards Regression Models Built With Genetic Features Alone

**eFigure 3.** Kaplan-Meier Curves of Patients Who Underwent Postoperative Adjuvant Radiotherapy Stratified Using Elastic Net Penalized Cox Proportional Hazards Regression Models Built With Genetic Features Alone

**eFigure 4.** Kaplan-Meier Curves of Patients Who Underwent Surgery Alone Stratified Using Elastic Net Penalized Cox Proportional Hazards Regression Models Built With Genetic Features Alone

**eFigure 5.** Features Associated With Prognostic Prediction

**eTable 1.** Follow-up Duration in Each Group of Patients

**eTable 2.** Akaike Information Criterion Comparison of the Elastic Net Penalized Cox Proportional Hazards Regression Models Built With Comprehensive Clinicopathologic and Genetic Features vs Clinicopathologic Features Alone and Genetic Features

**eTable 3.** Harrell's Concordance Index Comparison of the Elastic Net Penalized Cox Proportional Hazards Regression Models Built With Comprehensive Clinicopathologic and Genetic Features vs Clinicopathologic Features Alone and Genetic Features

**eTable 4.** Features Associated With Prognostic Prediction and the Hazard Ratios

**eAppendix.** Online Calculator for Survival Risk Stratification in Patients With Advanced Oral Cancer

This supplementary material has been provided by the authors to give readers additional information about their work.

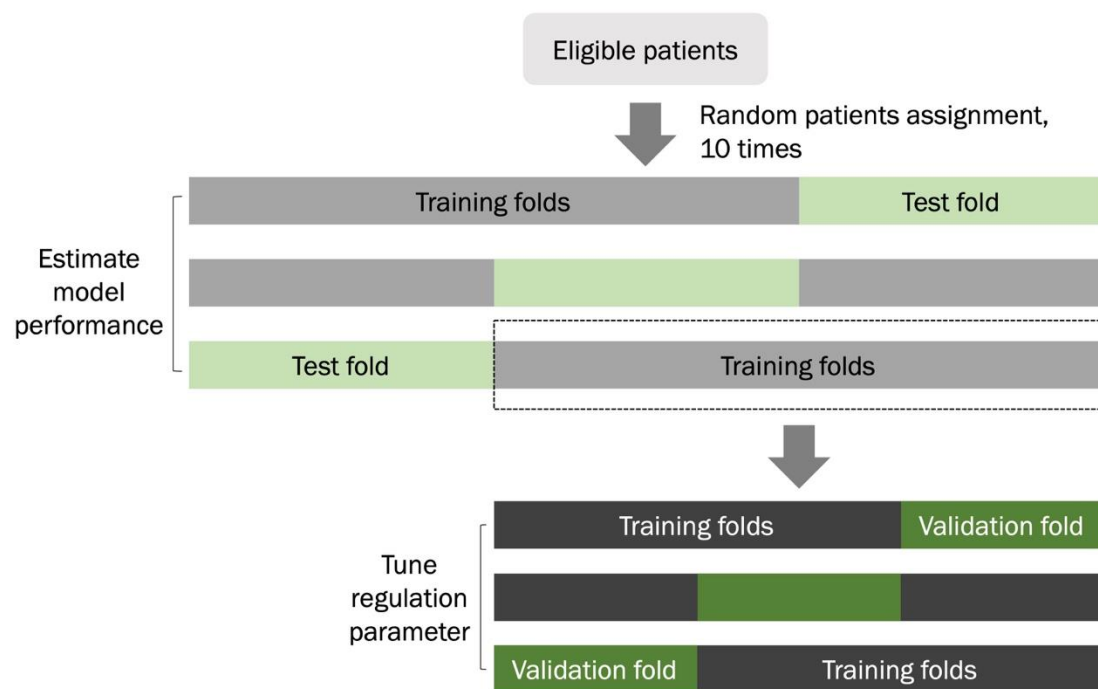

**eFigure 1.** Elastic-Net Penalized Cox Proportional Hazards Regression Model Development and Evaluation Flowchart

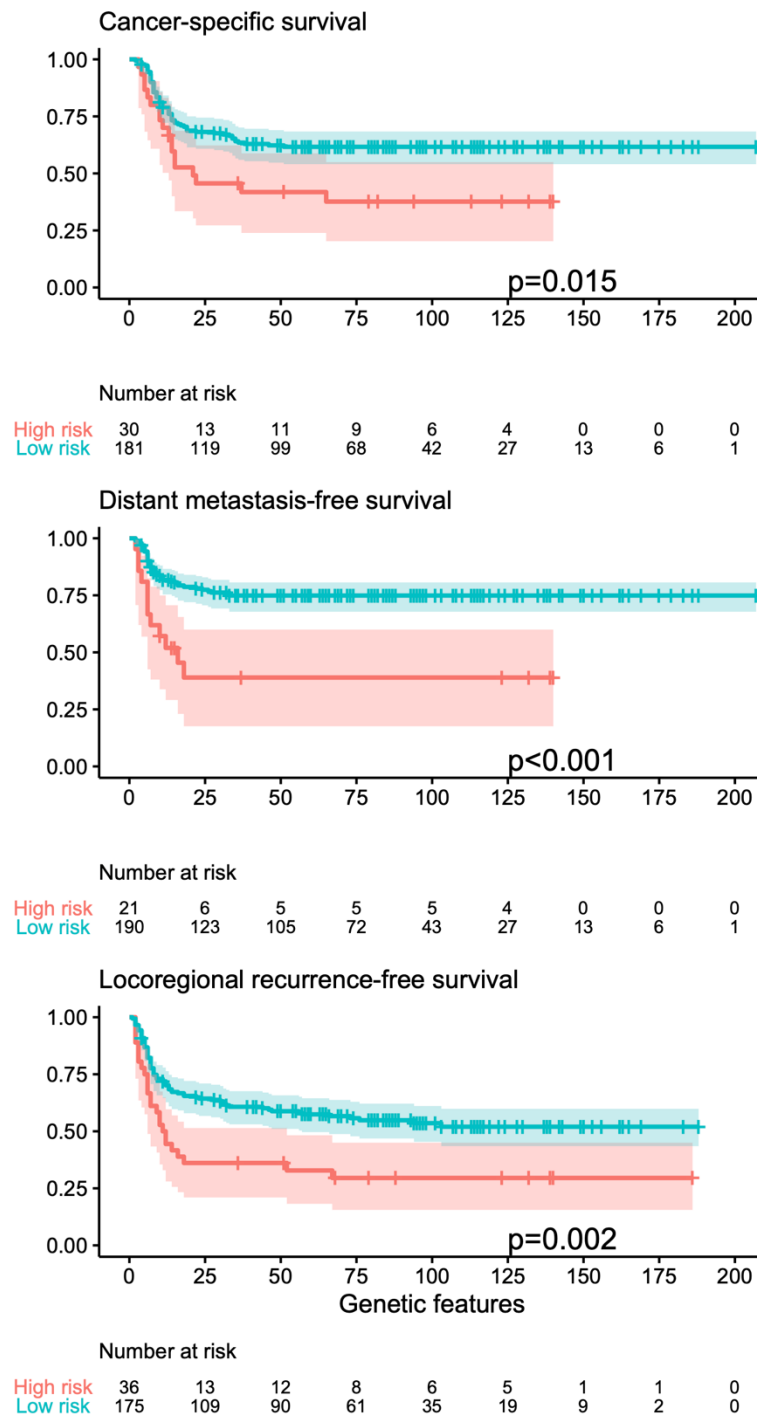

**eFigure 2.** Kaplan-Meier Curves of Patients Who Underwent Postoperative Adjuvant Concurrent Chemoradiotherapy Stratified Using Elastic Net Penalized Cox Proportional Hazards Regression Models Built With Genetic Features Alone

The models were built to predict the three types of prognostic survival outcomes, namely cancer-specific survival, distant metastasis-free survival, and locoregional recurrence-free survival.

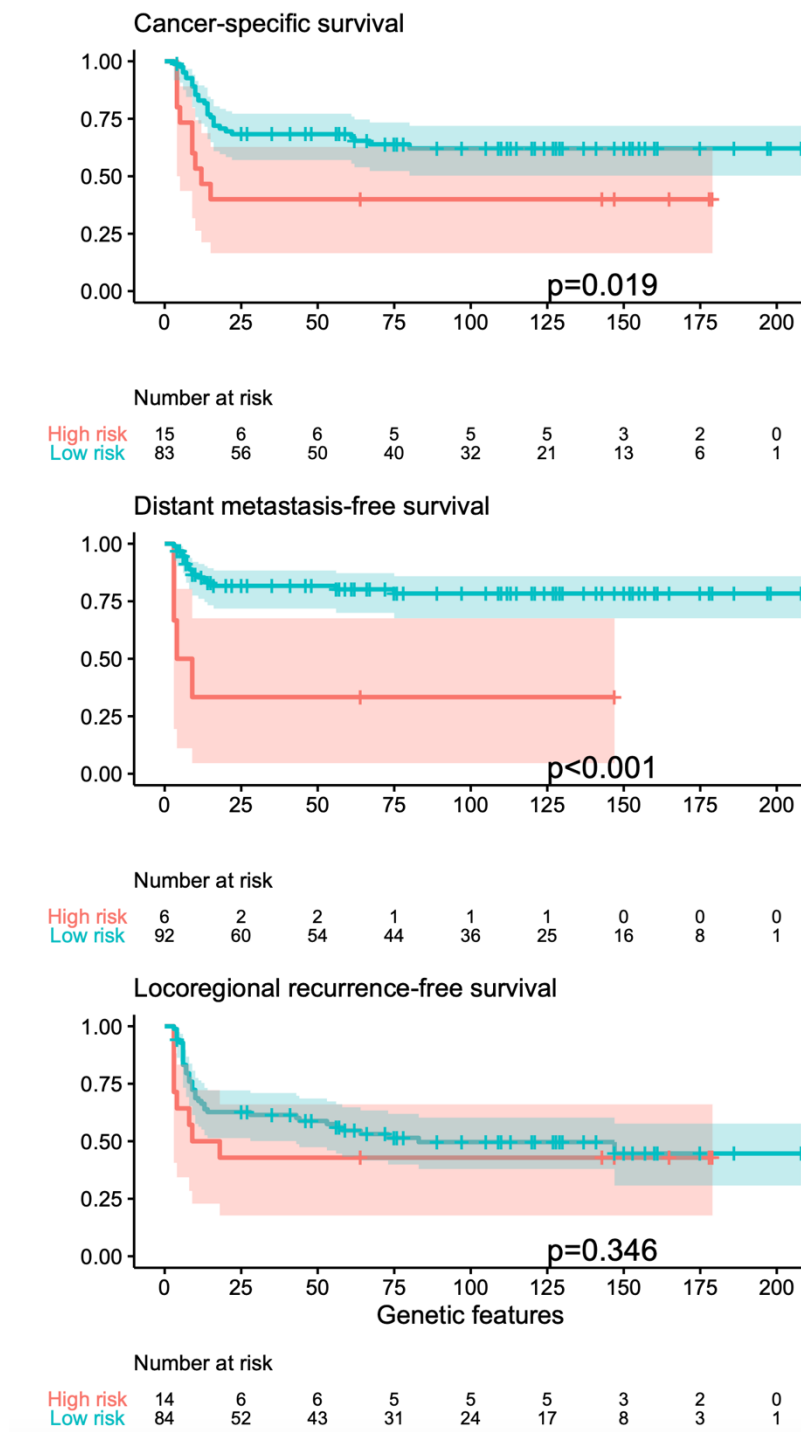

**eFigure 3.** Kaplan-Meier Curves of Patients Who Underwent Postoperative Adjuvant Radiotherapy Stratified Using Elastic Net Penalized Cox Proportional Hazards Regression Models Built With Genetic Features Alone

The models were built to predict the three types of prognostic survival outcomes, namely cancer-specific survival, distant metastasis-free survival, and locoregional recurrence-free survival.

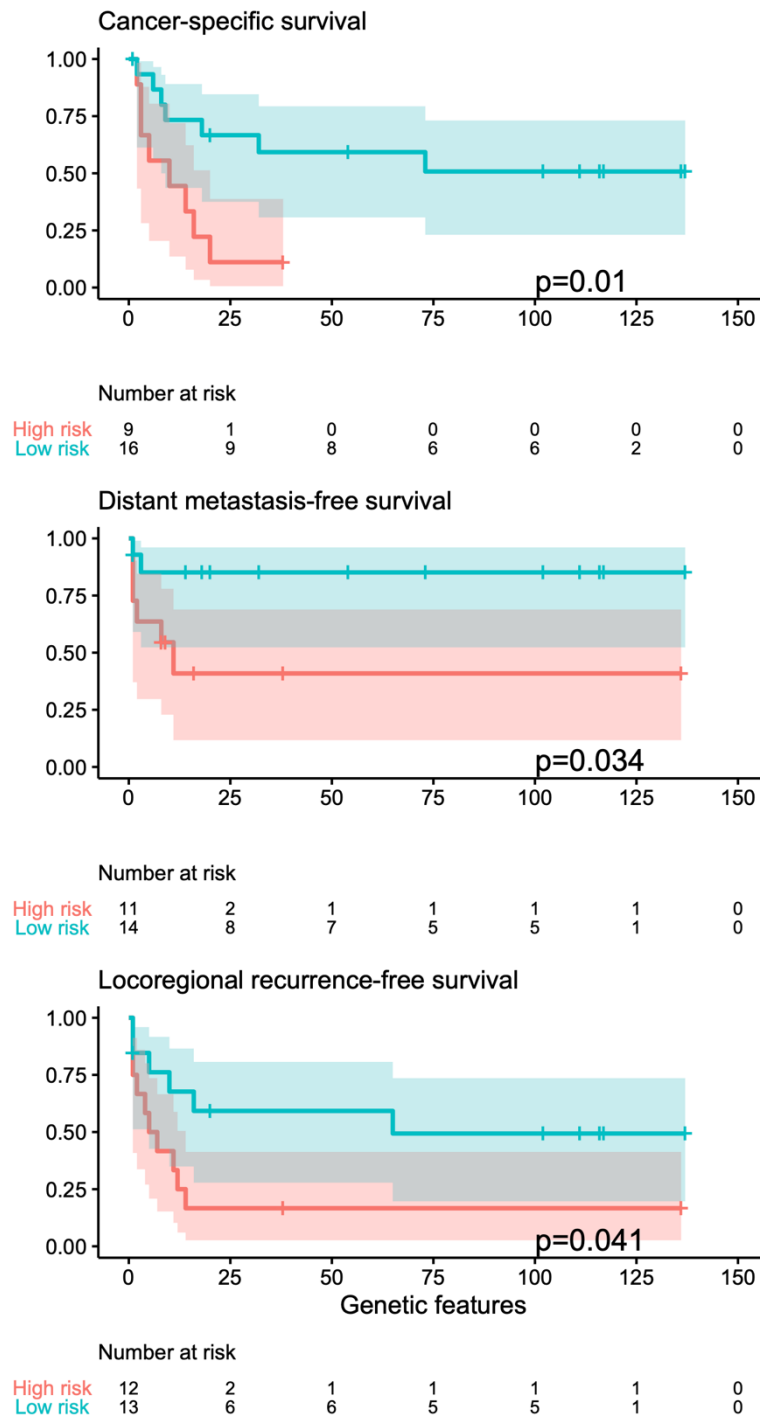

**eFigure 4.** Kaplan-Meier Curves of Patients Who Underwent Surgery Alone Stratified Using Elastic Net Penalized Cox Proportional Hazards Regression Models Built With Genetic Features Alone

The models were built to predict the three types of prognostic survival outcomes, namely cancer-specific survival, distant metastasis-free survival, and locoregional recurrence-free survival.

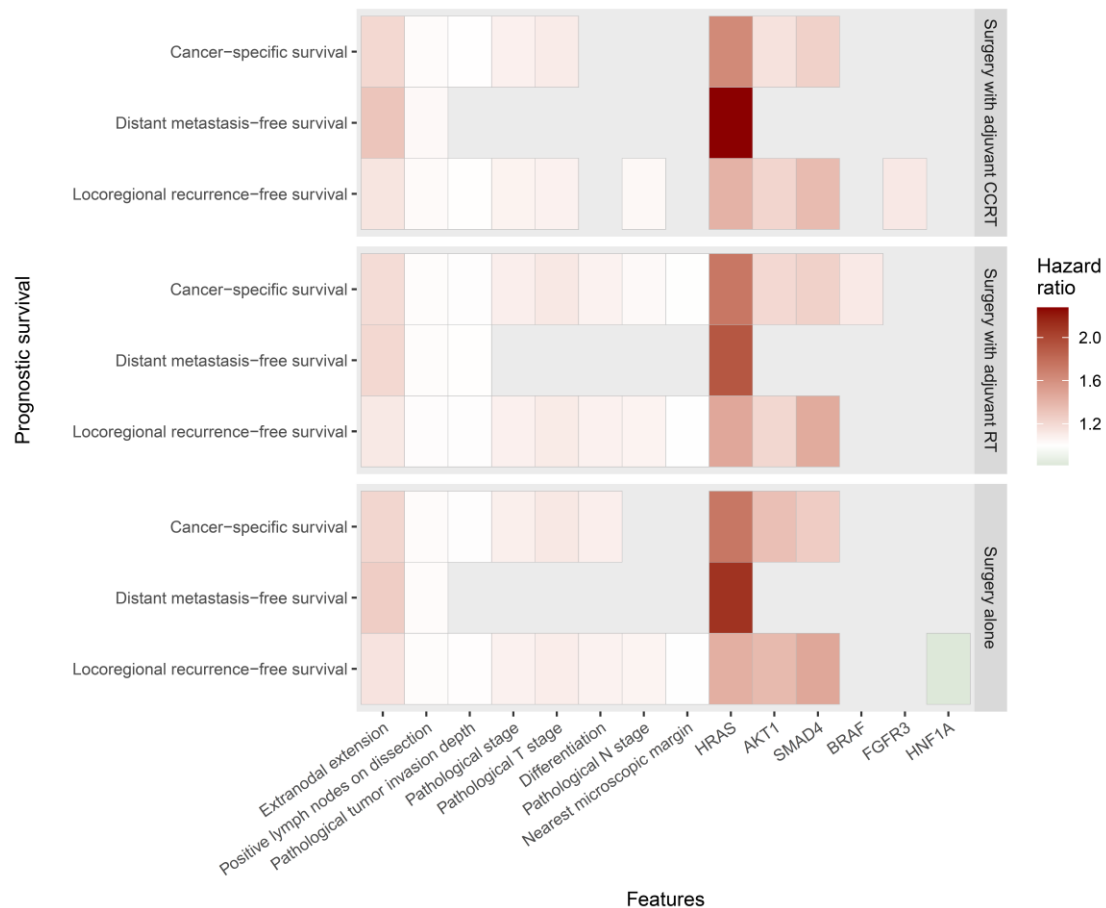

**eFigure 5.** Features Associated With Prognostic Prediction

The clinicopathologic and genetic features selected by more than 80% of the elastic-net penalized Cox's proportional hazards regression models are plotted in the figure. The block colors indicate the hazard ratios of clinicopathologic and genetic features in prognostic models. The feature is not selected in the specific model colored in gray. RT: radiotherapy; CCRT: concurrent chemoradiation.

**eTable 1.** Follow-up Duration in Each Group of Patients

The number of patients and their follow-up durations in high- and low-risk groups for each survival outcome divided by the models that were built using clinicopathologic and genetic features.

|                                         | Survival outcome for risk classification | Risk level | Case number | Follow-up duration, median (IQR) |
|-----------------------------------------|------------------------------------------|------------|-------------|----------------------------------|
| Surgery with adjuvant CCRT <sup>a</sup> | Cancer-specific survival                 | High       | 128         | 32.5 (83.25)                     |
|                                         |                                          | Low        | 83          | 65 (64.5)                        |
|                                         | Distant metastasis-free survival         | High       | 133         | 36 (85)                          |
|                                         |                                          | Low        | 78          | 64.5 (74.75)                     |
|                                         | Locoregional recurrence-free survival    | High       | 128         | 15 (73.25)                       |
|                                         |                                          | Low        | 83          | 64 (65)                          |
| Surgery with adjuvant RT <sup>b</sup>   | Cancer-specific survival                 | High       | 30          | 15 (66.25)                       |
|                                         |                                          | Low        | 68          | 84.5 (116.5)                     |
|                                         | Distant metastasis-free survival         | High       | 27          | 9 (40)                           |
|                                         |                                          | Low        | 71          | 78 (108)                         |
|                                         | Locoregional recurrence-free survival    | High       | 30          | 9 (34.75)                        |
|                                         |                                          | Low        | 68          | 65 (116.5)                       |
| Surgery alone                           | Cancer-specific survival                 | High       | 11          | 6 (9)                            |
|                                         |                                          | Low        | 14          | 63.5 (94.75)                     |
|                                         |                                          | High       | 10          | 2.5 (9.25)                       |

|  |                                       |      |    |            |
|--|---------------------------------------|------|----|------------|
|  | Distant metastasis-free survival      | Low  | 15 | 54 (97.5)  |
|  | Locoregional recurrence-free survival | High | 10 | 1 (3.25)   |
|  |                                       | Low  | 15 | 38 (101.5) |

**eTable 2.** Akaike Information Criterion Comparison of the Elastic Net Penalized Cox Proportional Hazards Regression Models Built With Comprehensive Clinicopathologic and Genetic Features vs Clinicopathologic Features Alone and Genetic Features

| Outcome                               | Akaike information criterion<br>[mean (SD) or median (IQR)] |                                     |                              | P values<br>All features test<br>Paired test |
|---------------------------------------|-------------------------------------------------------------|-------------------------------------|------------------------------|----------------------------------------------|
|                                       | Using<br>clinicopathologic and genetic<br>features          | Using<br>clinicopathologic features | Using<br>genetic<br>features |                                              |
| Surgery with adjuvant CCRT            |                                                             |                                     |                              |                                              |
| Cancer-specific survival              | 851.634 (6.621)                                             | 856.638 (7.350)                     | 870.004 (1.562)              | <0.001 <sup>a</sup><br>0.363 <sup>c</sup>    |
| Distant metastasis-free survival      | 577.373 (4.513)                                             | 579.848 (1.651)                     | 579.709 (2.403)              | 0.12 <sup>a</sup><br>0.17 <sup>c</sup>       |
| Locoregional recurrence-free survival | 1009.879<br>(5.238)                                         | 1012.244<br>(4.246)                 | 1026.193<br>(1.322)          | <0.001 <sup>a</sup><br>0.402 <sup>c</sup>    |
| Surgery with adjuvant RT <sup>e</sup> |                                                             |                                     |                              |                                              |
| Cancer-specific survival              | 331.160 (2.305)                                             | 331.160 (3.075)                     | 337.088 (0.786)              | <0.001 <sup>b</sup><br>1 <sup>d</sup>        |
| Distant metastasis-free survival      | 183.336 (2.879)                                             | 188.243 (2.686)                     | 186.315 (2.659)              | <0.001 <sup>b</sup><br>0.006 <sup>d</sup>    |
| Locoregional recurrence-free survival | 407.532 (5.127)                                             | 405.148 (5.381)                     | 414.525 (0.286)              | <0.001 <sup>b</sup><br>1 <sup>d</sup>        |
| Surgery alone <sup>e</sup>            |                                                             |                                     |                              |                                              |
| Cancer-specific survival              | 71.634 (6.536)                                              | 65.703 (4.835)                      | 76.491 (2.169)               | <0.001 <sup>b</sup><br>0.378 <sup>d</sup>    |

|                                       |                |                |                |                                           |
|---------------------------------------|----------------|----------------|----------------|-------------------------------------------|
| Distant metastasis-free survival      | 31.727 (1.448) | 35.246 (4.925) | 41.701 (1.894) | <0.001 <sup>b</sup><br>0.017 <sup>d</sup> |
| Locoregional recurrence-free survival | 76.622 (0)     | 75.285 (0)     | 86.389 (0.828) | <0.001 <sup>b</sup><br>0.021 <sup>d</sup> |

Abbreviations: CCRT, concurrent chemoradiation; RT, radiotherapy; SD, standard deviation

<sup>a</sup> Repeated ANOVA test, comparing three feature sets; <sup>b</sup> Friedman's test, comparing three feature sets

<sup>c</sup> Pairwise paired t-tests, comparing models using clinicopathologic and genetic features versus those that used clinicopathologic features, alone. P-values are adjusted using the Bonferroni multiple testing correction method.

<sup>d</sup> Pairwise paired Wilcoxon signed-rank test, comparing models using clinicopathologic and genetic features versus clinicopathologic features alone. P-values are adjusted using the Bonferroni multiple testing correction method.

<sup>d</sup> This data point is reported as the median (IQR)

**eTable 3.** Harrell's Concordance Index Comparison of the Elastic Net Penalized Cox Proportional Hazards Regression Models Built With Comprehensive Clinicopathologic and Genetic Features vs Clinicopathologic Features Alone and Genetic Features

|                                       | Harrell's concordance index<br>[mean (SD) or median (IQR)] |                               |                     |                                              |
|---------------------------------------|------------------------------------------------------------|-------------------------------|---------------------|----------------------------------------------|
| Outcome                               | Clinicopathologic<br>and genetic features                  | Clinicopathologic<br>features | Genetic<br>features | P values<br>All features test<br>Paired test |
| Surgery with adjuvant CCRT            |                                                            |                               |                     |                                              |
| Cancer-specific survival              | 0.689 (0.050)                                              | 0.673 (0.051)                 | 0.556 (0.035)       | <0.001 <sup>a</sup><br>0.022 <sup>c</sup>    |
| Distant metastasis-free survival      | 0.702 (0.056)                                              | 0.688 (0.048)                 | 0.565 (0.032)       | <0.001 <sup>a</sup><br>0.092 <sup>c</sup>    |
| Locoregional recurrence-free survival | 0.693 (0.039)                                              | 0.678 (0.035)                 | 0.557 (0.030)       | <0.001 <sup>a</sup><br>0.004 <sup>c</sup>    |
| Surgery with adjuvant RT              |                                                            |                               |                     |                                              |
| Cancer-specific survival              | 0.700 (0.056)                                              | 0.674 (0.054)                 | 0.556 (0.045)       | <0.001 <sup>a</sup><br><0.001 <sup>c</sup>   |
| Distant metastasis-free survival      | 0.705 (0.079)                                              | 0.65 (0.069)                  | 0.605 (0.069)       | <0.001 <sup>a</sup><br><0.001 <sup>c</sup>   |
| Locoregional recurrence-free survival | 0.644 (0.064)                                              | 0.618 (0.066)                 | 0.543 (0.050)       | <0.001 <sup>a</sup><br>0.004 <sup>c</sup>    |
| Surgery alone <sup>e</sup>            |                                                            |                               |                     |                                              |
| Cancer-specific survival              | 0.865 (0.071)                                              | 0.888 (0.074)                 | 0.697 (0.107)       | <0.001 <sup>b</sup><br>0.522 <sup>d</sup>    |

|                                       |               |               |               |                                       |
|---------------------------------------|---------------|---------------|---------------|---------------------------------------|
| Distant metastasis-free survival      | 0.895 (0.087) | 0.879 (0.124) | 0.768 (0.140) | <0.001 <sup>b</sup><br>1 <sup>d</sup> |
| Locoregional recurrence-free survival | 0.819 (0.092) | 0.827 (0.121) | 0.658 (0.111) | <0.001 <sup>b</sup><br>1 <sup>d</sup> |

Abbreviations: CCRT, concurrent chemoradiation; RT, radiotherapy; SD, standard deviation

<sup>a</sup> Repeated ANOVA test, comparing three feature sets; <sup>b</sup> Friedman's test, comparing three feature sets

<sup>c</sup> Pairwise paired t-tests, comparing models using clinicopathologic and genetic features versus those that used clinicopathologic features, alone. P-values are adjusted using the Bonferroni multiple testing correction method.

<sup>d</sup> Pairwise paired Wilcoxon signed-rank test, comparing models using clinicopathologic and genetic features versus clinicopathologic features alone. P-values are adjusted using the Bonferroni multiple testing correction method.

<sup>d</sup> This data point is reported as the median (IQR)

**eTable 4.** Features Associated With Prognostic Prediction and the Hazard Ratios

The clinicopathologic and genetic features selected by more than 80% ( $n \geq 24$ ) of the elastic-net penalized Cox's proportional hazards regression models in each treatment and survival groups and the hazard ratios. RT: radiotherapy; CCRT: concurrent chemoradiation.

|                                    | Cancer-specific survival |               | Distant metastasis-free survival |               | Locoregional recurrence-free survival |               |
|------------------------------------|--------------------------|---------------|----------------------------------|---------------|---------------------------------------|---------------|
| Features                           | Models (%)               | HR, mean (SD) | Models (%)                       | HR, mean (SD) | Models (%)                            | HR, mean (SD) |
| Surgery with adjuvant CCRT         |                          |               |                                  |               |                                       |               |
| <i>AKT1</i>                        | 87                       | 1.15 (0.10)   | -                                | -             | 100                                   | 1.22 (0.14)   |
| Extranodal extension               | 100                      | 1.21 (0.11)   | 100                              | 1.31 (0.14)   | 100                                   | 1.14 (0.05)   |
| <i>FGFR3</i>                       | -                        | -             | -                                | -             | 100                                   | 1.12 (0.09)   |
| <i>HRAS</i>                        | 100                      | 1.63 (0.43)   | 100                              | 2.28 (0.76)   | 100                                   | 1.41 (0.23)   |
| Pathologic N stage                 | -                        | -             | -                                | -             | 100                                   | 1.04 (0.01)   |
| Pathologic stage                   | 87                       | 1.08 (0.04)   | -                                | -             | 100                                   | 1.07 (0.03)   |
| Pathologic T stage                 | 100                      | 1.1 (0.05)    | -                                | -             | 100                                   | 1.07 (0.04)   |
| Pathologic tumor invasion depth    | 100                      | 1.01 (0)      | -                                | -             | 100                                   | 1.01 (0)      |
| Positive lymph nodes on dissection | 97                       | 1.02 (0.01)   | 100                              | 1.04 (0.03)   | 100                                   | 1.03 (0.02)   |
| <i>SMAD4</i>                       | 80                       | 1.24 (0.27)   | -                                | -             | 100                                   | 1.36 (0.39)   |
| Surgery with adjuvant RT           |                          |               |                                  |               |                                       |               |

|                                    |     |                |     |                |     |                |
|------------------------------------|-----|----------------|-----|----------------|-----|----------------|
| <i>AKT1</i>                        | 97  | 1.21<br>(0.10) | -   | -              | 90  | 1.21<br>(0.08) |
| <i>BRAF</i>                        | 90  | 1.11<br>(0.07) | -   | -              | -   | -              |
| Differentiation                    | 97  | 1.07<br>(0.04) | -   | -              | 80  | 1.07<br>(0.04) |
| Extranodal extension               | 100 | 1.18<br>(0.06) | 100 | 1.21<br>(0.15) | 100 | 1.12<br>(0.04) |
| <i>HRAS</i>                        | 100 | 1.74<br>(0.30) | 100 | 1.92<br>(0.64) | 100 | 1.47<br>(0.21) |
| Nearest microscopic margin         | 80  | 0.99 (0)       | -   | -              | 87  | 0.99 (0)       |
| Pathologic N stage                 | 97  | 1.03<br>(0.01) | -   | -              | 100 | 1.06<br>(0.02) |
| Pathologic stage                   | 97  | 1.09<br>(0.03) | -   | -              | 83  | 1.08<br>(0.04) |
| Pathologic T stage                 | 100 | 1.12<br>(0.04) | -   | -              | 100 | 1.11<br>(0.03) |
| Pathologic tumor invasion depth    | 100 | 1.01 (0)       | 87  | 1.01<br>(0.01) | 100 | 1.01 (0)       |
| Positive lymph nodes on dissection | 100 | 1.02<br>(0.01) | 97  | 1.02<br>(0.01) | 100 | 1.01 (0)       |
| <i>SMAD4</i>                       | 97  | 1.25<br>(0.16) | -   | -              | 97  | 1.45<br>(0.23) |
| Surgery alone                      |     |                |     |                |     |                |
| <i>AKT1</i>                        | 100 | 1.34<br>(0.13) | -   | -              | 100 | 1.37<br>(0.09) |
| Differentiation                    | 90  | 1.09<br>(0.05) | -   | -              | 97  | 1.07<br>(0.04) |
| Extranodal extension               | 100 | 1.22<br>(0.06) | 100 | 1.26<br>(0.15) | 100 | 1.15<br>(0.03) |
| <i>HNFI A</i>                      | -   | -              | -   | -              | 90  | 0.82<br>(0.09) |
| <i>HRAS</i>                        | 100 | 1.74<br>(0.31) | 100 | 2.11<br>(0.67) | 100 | 1.43<br>(0.17) |

|                                    |     |                |     |                |     |                |
|------------------------------------|-----|----------------|-----|----------------|-----|----------------|
| Nearest microscopic margin         | -   | -              | -   | -              | 80  | 0.99 (0)       |
| Pathologic N stage                 | -   | -              | -   | -              | 100 | 1.06<br>(0.01) |
| Pathologic stage                   | 97  | 1.09<br>(0.04) | -   | -              | 93  | 1.07<br>(0.02) |
| Pathologic T stage                 | 100 | 1.12<br>(0.04) | -   | -              | 100 | 1.09<br>(0.02) |
| Pathologic tumor invasion depth    | 100 | 1.01 (0)       | -   | -              | 100 | 1.01 (0)       |
| Positive lymph nodes on dissection | 100 | 1.02<br>(0.01) | 100 | 1.02<br>(0.01) | 100 | 1.02 (0)       |
| <i>SMAD4</i>                       | 93  | 1.27<br>(0.14) | -   | -              | 100 | 1.47<br>(0.19) |

## eAppendix. Online Calculator for Survival Risk Stratification in Patients With Advanced Oral Cancer

An online calculator for differentiating risk levels in cancer-specific survival, distant metastasis-free survival, and locoregional recurrence-free survival for postoperative patients with advanced oral cancer. Available at <http://shiny.yjtseng.info/content/21/>.

### Survival risk stratification in patients with OSCC

Authors: Yi-Ju Tseng, Hsin-Yao Wang, Ting-Wei Lin, Jang-Jih Lu, Chia-Hsun Hsieh, and Chun-Ta Liao

Chang Gung University and Chang Gung Memorial Hospital, Taiwan

Please input the following data of your patients with OSCC

**Treatment**

☒ Surgery with adjuvant CCRT

Surgery with adjuvant RT

Surgery alone

**Gene Mutation**

AKT1

BRAF

FGFR3

☒ HNF1A

☒ HRAS

SMAD4

**Differentiation**

Well

Moderate

☒ Poor

**Extranodal extension**

☐

**Pathologic T stage**

1

2

3

☒ 4

**Pathologic N stage**

1

2a

2b

☒ 2c

**Pathologic stage**

3

☒ 4

**Pathologic tumor invasion depth, mm**

3

**Nearest microscopic margin, mm**

2

**Positive lymph nodes on dissection**

2

**Predict**

### Prediction results

**Cancer-specific survival**

⚠ High risk group

**Distant metastasis-free survival**

⚠ High risk group

**Locoregional recurrence-free survival**

🔍 Low risk group

**Overall risk stratification**

⚠ Heterogeneous high risk subgroup
